1 **Quantitative crosslinking and mass spectrometry determine**  
2 **binding interfaces and affinities mediating kinetochore**  
3 **stabilization**

4

5

6 Goetz Hagemann<sup>1</sup>†, Victor Solis-Mezarino<sup>1</sup>†, Sylvia Singh<sup>1</sup>, Mia Potocnjak<sup>1</sup>, Chandni  
7 Kumar<sup>1</sup> and Franz Herzog<sup>1</sup>\*.

8

9 <sup>1</sup> Gene Center and Department of Biochemistry, Ludwig-Maximilians-Universität München,  
10 Munich 81377, Germany.

11

12 \* Correspondence to: [herzog@genzentrum.lmu.de](mailto:herzog@genzentrum.lmu.de) (F.H.)

13 †These Authors contributed equally to this work.

14

15

16

17

18

19

20

21

22

23

24

25 **Abstract**

26 Crosslinking and mass spectrometry (XLMS) are used in integrative structural biology to  
27 acquire spatial restraints. We found a dependency between crosslink distances and intensities  
28 and developed a quantitative workflow to simultaneously estimate apparent dissociation  
29 constants ( $K_D$ ) of contacts within multi-subunit complexes and to aid interface prediction.  
30 Quantitative XLMS was applied to study the assembly of the macromolecular kinetochore  
31 complex, which is built on centromeric chromatin and establishes a stable link to spindle  
32 microtubules in order to segregate chromosomes during cell division. Inter-protein crosslink  
33 intensities facilitated determination of phosphorylation-induced binding interfaces and affinity  
34 changes. Phosphorylation of outer and inner kinetochore proteins mediated cooperative  
35 kinetochore stabilization and decreased the  $K_D$  values of its interactions to the centromeric  
36 nucleosome by ~200-fold, which was essential for cell viability. This work demonstrates the  
37 potential of quantitative XLMS for characterizing mechanistic effects on protein assemblies  
38 upon post-translational modifications or cofactor interaction and for biological modeling.

39

40

41

42

43

44

45

46

47

48

49

## 50 **Main**

51 Distance restraints derived from the mass spectrometric identification of crosslinked amino  
52 acids (XLMS) are widely applied in integrative approaches to determine protein connectivity<sup>1</sup>  
53 and to model the topology of proteins and their domains in a complex<sup>2</sup>. Quantification of  
54 crosslinks has been initially implemented to detect conformational changes and domain  
55 interactions<sup>3-5</sup>. Besides structure, the critical determinant of the molecular mechanism of a  
56 complex is the interaction strength of its subunit contacts, which can be modulated through  
57 cofactors or post-translational modifications to execute its biological function on time. Several  
58 biophysical methods<sup>6</sup> are available to measure protein-protein affinity through estimation of  
59 the apparent dissociation constant ( $K_D$ ), but the individual methods mainly analyze binary  
60 interactions and require high protein concentrations, protein engineering, immobilization or  
61 labeling which may affect the integrity of complexes. We reasoned that crosslink intensities  
62 provide a quantitative measure for the formed complex and the free subunits at the equilibrium  
63 state. Thus, we investigated whether crosslink intensities facilitate the simultaneous estimation  
64 of individual protein-protein affinities within kinetochore multi-subunit complexes.

65 The kinetochore is a macromolecular protein complex assembled at centromeric chromatin that  
66 ensures the fidelity of chromosome segregation by connecting chromosomes and spindle  
67 microtubules and by integrating feedback control mechanisms<sup>7,8</sup>. In order to bi-orient  
68 chromosomes on the mitotic spindle the budding yeast kinetochore has to transmit forces of  
69  $\sim 10$  pN<sup>9,10</sup> by forming a load-bearing attachment to spindle microtubules and a high-affinity  
70 link to the centromeric nucleosome, marked by the histone H3 variant Cse4<sup>CENP-A</sup> (human  
71 orthologs are superscripted if appropriate). The kinetochore subunits are largely conserved  
72 between budding yeast and humans<sup>11,12</sup> and form stable subcomplexes, which are organized in  
73 two layers of the kinetochore architecture. The outer kinetochore, a 10-subunit network that is  
74 built up on the inner kinetochore, forms the microtubule binding site. The inner kinetochore is

75 assembled by at least 15 proteins on centromeric chromatin with Mif2 and Ame1/Okp1 directly  
76 linking the outer kinetochore MTW1 (Mtw1/Nnf1/Dsn1/Nsl1) complex to the Cse4-NCP  
77 (Cse4 containing nucleosome core particle) in budding yeast<sup>13-16</sup>. Whereas the human  
78 kinetochore assembly is temporally regulated, establishing a microtubule attachment site in  
79 mitosis, budding yeast kinetochores are built up and attached to a single microtubule almost  
80 throughout the entire cell cycle<sup>7,17,18</sup>. In both species, phosphorylation of Dsn1<sup>DSN1</sup> by the  
81 mitotic kinase Ipl1<sup>Aurora-B</sup> stabilizes the recruitment of the outer to the inner kinetochore<sup>19-21</sup>. In  
82 addition, phosphorylation of the human kinetochore by Plk1 has been shown to stabilize the  
83 inner kinetochore architecture at centromeric chromatin to withstand the pulling forces of  
84 depolymerizing microtubules<sup>22</sup>.

85 By quantifying crosslink-derived restraints we found a dependency between crosslink distances  
86 and intensities. This relation was applied to improve the prediction of protein binding interfaces  
87 and to determine apparent  $K_D$  values of their interactions, which provided quantitative  
88 measures to capture different functional states of the kinetochore. Our approach facilitated the  
89 detection of phosphorylation-induced changes in binding affinities between the centromeric  
90 nucleosome and a minimal kinetochore assembly composed of the outer kinetochore  
91 MTW1<sup>MIS12</sup> complex, the inner kinetochore Mif2<sup>CENP-C</sup> and Ame1/Okp1<sup>CENP-U/Q</sup> proteins.

92

## 93 **Results**

### 94 **Determination of crosslink intensity and its dependence on crosslink distance**

95 To quantify protein crosslinks, we first extracted the MS1 peak intensities of the MS2 based  
96 crosslink identifications using an in-house bioinformatics pipeline that merges the open-source  
97 software tools xQuest/xProphet<sup>23,24</sup> and OpenMS<sup>25</sup> (Fig. 1 and Methods). Protein complexes  
98 were crosslinked by modifying the  $\alpha$ -amino groups with the isotopically labeled BS2G-d<sub>0</sub>/d<sub>6</sub>  
99 reagent and crosslinked peptide fractions were analyzed by liquid chromatography coupled to

100 tandem mass spectrometry. The raw files were processed by the xQuest/xProphet software to  
101 identify the crosslinked peptides, their precursor ion masses and retention times. This  
102 information was subsequently used for the extraction of ion chromatograms by the OpenMS  
103 software tool, which were summarized in text tables. The quantification pipeline was  
104 benchmarked against available datasets showing that our bioinformatics workflow performs  
105 similarly to previously reported software tools in terms of signal detection rate and accuracy  
106 of quantification, and is independent of the crosslinker type (Supplementary Fig. 1).  
107 Quantifying the crosslinks of published multi-protein complex datasets<sup>26,27</sup> and mapping the  
108 corresponding Euclidean lysine-lysine distances on available crystal structures, including those  
109 of RNA polymerase I and II, indicated that shorter Euclidean distances between the crosslinked  
110 lysines correlate with increasing crosslink intensities (Fig. 2a and Supplementary Fig. 2). We  
111 assumed that the inter-protein crosslink intensity is also affected by the physicochemical  
112 microenvironment of individual lysines as well as by a competition for the formation of intra-  
113 , inter-protein or mono-links at a specific lysine site during the crosslinking reaction. To assess  
114 whether crosslink intensities increase for lysine sites proximal to binding interfaces, we  
115 mapped the intensity values along the sequences of the RPB1-RPB2 interaction in RNA  
116 polymerase II (Supplementary Fig. 3a) as well as of the budding yeast kinetochore Cnn1-  
117 Spc24/25 interaction (Supplementary Fig. 3b). We normalized the inter-protein crosslink  
118 intensities to the sum of intensities of intra- and inter-protein crosslinks and monolinks  
119 occurring at a specific lysine residue. This normalized intensity value or 'Relative Interface  
120 Propensity Index' (RIPI) served as an indicator for putative interface sequences and was applied  
121 in an heuristic approach together with secondary structural elements, sequence conservation  
122 and other parameters to aid in the prediction of protein-protein interfaces (Supplementary Fig.  
123 3 and Methods).

124

## 125 **Estimation of protein affinities based on crosslink intensities**

126 We further applied inter- and intra-protein crosslink intensities to estimate the concentrations  
127 of the formed complex and the free subunits according to the steady state equilibrium in  
128 solution. To assess whether crosslink intensities supported the estimation of binding affinities  
129 we purified recombinant kinetochore subunits and titrated complex formation over a range of  
130 molar ratios. First, the inner and outer kinetochore proteins Cnn1<sup>1-270</sup> and Spc24/25<sup>28</sup>,  
131 respectively, were titrated by applying molar ratios from 0.05:1 to 2:1 (Fig. 1, Supplementary  
132 Fig. 4 and Supplementary Table 1). To capture the equilibrium state of the binding reaction by  
133 crosslinking, the reaction time of the BS2G-d<sub>0</sub>/d<sub>6</sub> reagent was limited to 2 minutes. Intra-  
134 protein crosslink intensities of the constant interactor facilitated the normalization between  
135 titration steps and those of the titrated interactor enabled the calculation of a linear regression  
136 of the intra-protein intensities on the increasing input protein concentrations (Supplementary  
137 Fig. 4 and Supplementary Table 2). The regression model was applied to interpolate the  
138 concentration of the formed complex from the inter-protein crosslink intensities (Fig. 1).

139 The estimation of the apparent K<sub>D</sub> value was performed first by the *Scatchard* plot<sup>29</sup> (Fig. 2b  
140 and Methods) that indicates the K<sub>D</sub> value as the negative inverse of the slope. We calculated  
141 the K<sub>D</sub> values for three different sets of inter-protein crosslinks (Fig. 2b). Applying either all  
142 inter-protein crosslinks to Cnn1<sup>1-270</sup> or only those intersecting with the structured domains of  
143 Spc24/25 resulted in K<sub>D</sub> values of 120 nM or 50 nM, respectively. The subset of inter-links  
144 decorating the Cnn1<sup>60-84</sup> motif, that is required for mediating the interaction with Spc24/25,  
145 showed a K<sub>D</sub> of 15 nM which agrees with the value previously obtained by isothermal titration  
146 calorimetry (ITC)<sup>28</sup>. This observation is consistent with the notion that residues proximal to the  
147 interface may be stably positioned and thus yield relatively higher inter-protein crosslink  
148 intensities. The second method used the steady state equilibrium equation to calculate the mean  
149 of K<sub>D</sub> values of each titration step from the concentrations of the formed complex and the free

150 interactors (Figs. 1, 2c and Supplementary Table 3). The second approach based on the steady  
151 state equilibrium equation closely reproduced the values obtained by the *Scatchard* plot.  
152 Moreover, a similar experiment was performed by titrating increasing concentrations of the  
153 Cnn1<sup>60-84</sup> peptide, containing the minimal binding motif, against the Spc24/25 dimer. The  
154 estimated  $K_D$  value of 2.6  $\mu$ M (Supplementary Figs. 5 and 6) agrees with previous ITC  
155 measurements<sup>28</sup> and suggests that Cnn1 sequences outside the Cnn1<sup>60-84</sup> motif contribute to the  
156 stabilization of the interaction.

157

### 158 **Phosphorylation of the inner kinetochore by Cdc5<sup>Plk1</sup> induces its cooperative stabilisation** 159 **on Cse4 nucleosomes**

160 To determine the apparent  $K_D$  values of the individual interactions that assemble the  
161 kinetochore on the octameric Cse4 nucleosome, we *in vitro* reconstituted kinetochore  
162 complexes of up to 11 recombinant proteins (Fig. 3a) purified from *E. coli*, except Mif2, which  
163 was isolated from insect cells (Methods). We first reproduced the interaction of Mif2 and  
164 Ame1/Okp1<sup>15</sup>, both of which directly bind Cse4-NCPs<sup>13,14,30</sup>, and found that this interaction  
165 was lost upon dephosphorylation of Mif2 (Fig. 3b). *In vitro* phosphorylation of lambda-  
166 phosphatase-treated Mif2 by the mitotic kinases Cdc28<sup>CDK1</sup>, Cdc5<sup>PLK1</sup>, Ip11<sup>Aurora-B</sup> and  
167 Mps1<sup>MPS1</sup> showed that Cdc5<sup>PLK1</sup> restored Ame1/Okp1 binding to levels detected at insect cell-  
168 phosphorylated Mif2 (Fig. 3b). For the subsequent XLMS and binding experiments Mif2 wild-  
169 type and mutant proteins were *in vitro* phosphorylated by Cdc5 and are indicated as Mif2\*.

170 We first estimated apparent  $K_D$  values of the individual interactions of Cse4-NCP, Mif2\* and  
171 Ame1/Okp1 by titrating the Cse4-NCP with increasing concentrations of Mif2\* or Ame1/Okp1  
172 and by titrating Ame1/Okp1 with Mif2\* (Figs. 3c, d, e and Supplementary Fig. 7). The binding  
173 affinities of these binary interactions were then compared to the  $K_D$  values of these interactions  
174 in the Mif2\*:Ame1/Okp1:Cse4-NCP complex. Only intra- and inter-protein crosslinks yielding

175 the extraction of intensities from all 3 replicates (Supplementary Fig. 8) were applied to  
176 estimate the apparent  $K_D$  values based on the steady state equilibrium equation (Supplementary  
177 Table 4). The affinities of the binary interactions ranging from 3 to 6  $\mu\text{M}$  were increased 6-  
178 fold for the Mif2<sup>\*</sup>:Cse4-NCP interaction and 10-fold for the Ame1/Okp1:Cse4-NCP and  
179 Mif2<sup>\*</sup>:Ame1/Okp1 interactions in the Mif2<sup>\*</sup>:Ame1/Okp1:Cse4-NCP complex, indicating  
180 cooperative stabilization upon the phosphorylation-induced Mif2<sup>\*</sup>:Ame1/Okp1 interaction  
181 (Figs. 3c, d and Supplementary Table S5).

182 Similar to the  $K_D$  calculation of the Cnn1<sup>1-270</sup>:Spc24/25 interaction, the restriction of inter-  
183 protein crosslinks to the subset intersecting with the minimal binding motif, the Mif2<sup>285-311</sup>  
184 signature motif (Figs. 3d and e) which directly binds the CENP-A C-terminus<sup>16,31</sup>, resulted in  
185 lower  $K_D$  values. The  $K_D$  value of the Mif2<sup>\*</sup>:Cse4-NCP complex was reduced from 3.2 to 0.9  
186  $\mu\text{M}$  which is in agreement with ITC measurements of the Mif2<sup>285-311</sup> peptide with the Cse4-  
187 NCP showing a  $K_D$  of 0.5  $\mu\text{M}$ <sup>31</sup>. Upon the cooperative interactions of Mif2<sup>\*</sup> and Ame1/Okp1  
188 to the Cse4-NCP the  $K_D$  dropped by a factor of  $\sim 30$  from 0.6 to 0.03  $\mu\text{M}$  (Figs. 3d and e)  
189 demonstrating that quantitative XLMS facilitates the estimation of apparent  $K_D$  values and the  
190 detection of  $\sim 200$ -fold affinity changes in multi-subunit complexes.

191

## 192 **Phosphorylation of outer and inner kinetochore proteins synergistically enhance** 193 **kinetochore stabilization at the Cse4 nucleosome**

194 The tetrameric MTW1<sup>MIS12</sup> complex binds Mif2<sup>CENP-C</sup> and Ame1/Okp1. This interaction is  
195 stabilized upon Dsn1<sup>DSN1</sup> phosphorylation by Ipl1<sup>Aurora-B</sup> which releases the masking of the  
196 Mif2<sup>CENP-C</sup> and Ame1/Okp1 binding sites at the MTW1<sup>MIS12</sup> head I domain by Dsn1<sup>DSN1</sup> (Fig.  
197 3a)<sup>19,20,32,33</sup>. To test whether addition of MTW1c affected the interactions of Cse4-NCP with  
198 Mif2<sup>\*</sup> and Ame1/Okp1, we titrated constant levels of Cse4-NCPs with increasing  
199 concentrations of an equimolar mixture of Mif2<sup>\*</sup>:Ame1/Okp1:MTW1c which contained either



200 wild-type Dsn1 or the phosphorylation-mimicking Dsn1<sup>S240D,S250D</sup> mutant (Supplementary Fig.  
201 9). The quantification of inter-protein crosslinks (Supplementary Fig. 10 and Supplementary  
202 Table 6) intersecting with Mif2 indicated the previously reported Mif2 interfaces to the Cse4-  
203 NCP<sup>15,16,31</sup> and to the MTW1c (Supplementary Figs. 11 and 12a)<sup>8</sup>. The estimation of binding  
204 affinities by the steady state equilibrium equation revealed that addition of wild-type MTW1c  
205 did not affect the  $K_D$  values of Mif2\* and Ame1/Okp1 to the Cse4-NCP (Figs. 3d, 4a and b and  
206 Supplementary Table 7). In comparison, the phosphorylation-mimicking  
207 MTW1c(Dsn1<sup>S240D,S250D</sup>) decreased the  $K_D$  values by ~20-fold and a similar change in affinity  
208 was observed for the Mif2:Okp1 interaction (Figs. 4a and b). This indicated that in addition to  
209 the Mif2\*:Okp1 interaction, putatively mediated by Cdc5, phosphorylation of Dsn1 by Ipl1  
210 synergistically enhanced the binding affinity of Mif2\* and Ame1/Okp1 to the Cse4-NCP.

211

### 212 **The phosphorylation-induced cooperativity mediating kinetochore stabilization is** 213 **essential in budding yeast**

214 The RIPI calculated from inter-protein crosslink intensities of the Mif2\*:Okp1 interaction  
215 identified Mif2<sup>150-250</sup> and Okp1<sup>180-220</sup> as the putative binding motifs (Figs. 3a, 4c and  
216 Supplementary Fig. S12b). Based on the indicated regions, mutant proteins were generated to  
217 assess the required Mif2 phosphorylation sites mediating its interaction with Ame1/Okp1 in *in*  
218 *vitro* binding and cell viability assays. The Mif2<sup>Δ221-240</sup> mutant abrogated the  
219 Mif2\*:Ame1/Okp1 interaction *in vitro* whereas Mif2<sup>Δ200-230</sup> still bound (Fig. 5a). By assessing  
220 the phosphorylation dependency of this interaction (Fig. 3b), we found that Ame1/Okp1  
221 binding was lost upon mutating 9 serines to alanines within Mif2<sup>217-240</sup> (Fig. 5a and  
222 Supplementary Fig. 13a). Ectopic expression of the Mif2 mutants, that were impaired in  
223 Ame1/Okp1 binding, did not affect growth of budding yeast cells after nuclear depletion of  
224 endogenous Mif2 (Supplementary Figs. 14, 15a and Supplementary Table 8). Similarly, the

225 Dsn1<sup>S240A,S250A,S264A</sup> mutant, which has been previously shown to affect binding of the outer  
226 kinetochore MTW1 complex to the inner kinetochore, was viable (Fig. 5b)<sup>19</sup>. Notably, ectopic  
227 expression of the Mif2 mutants as only nuclear copies in a Dsn1<sup>S240A,S250A,S264A</sup> mutant  
228 background showed that the Mif2<sup>217-240\*9S-A</sup> mutant was synthetically lethal whereas the  
229 Mif2<sup>177-229\*9ST-A</sup> and Mif2<sup>232-240\*5S-A</sup> mutants grew normally (Fig. 5b). The synthetic growth  
230 defect of only the phosphorylation-deficient Mif2 mutants, that did not mediate interaction with  
231 Ame1/Okp1 *in vitro*, suggests that cooperative kinetochore stabilization through  
232 phosphorylation of Dsn1 and the Mif2 region 217-240 is required for cell viability.  
233 The putative Okp1 interface region included 2 predicted helices (Supplementary Fig. 12b and  
234 13b). A deletion mutant of the helix motif Okp1<sup>156-188</sup>, which was previously reported to be  
235 essential for binding the Cse4-END (essential-N-terminal-domain)<sup>14</sup>, was lethal but still bound  
236 Mif2\* *in vitro*, whereas the Okp1<sup>196-229</sup> helix deletion abrogated Mif2\* binding (Fig. 5c and  
237 Supplementary Fig. 13c) and inhibited cell growth (Fig. 5d and Supplementary Fig. 15b). Both  
238 Okp1 helices form an  $\alpha$ -helical hairpin-like structure (Fig. 6)<sup>30,34</sup> suggesting that the putative  
239 phosphorylation of the 9 serines within Mif2<sup>217-240</sup> establishes a cooperative high-affinity  
240 binding environment for the Cse4-NCP by bringing the Mif2<sup>217-240</sup>:Okp1<sup>196-220</sup>, Cse4-  
241 END:Okp1<sup>156-188</sup> and Mif2<sup>285-311</sup>:Cse4<sup>C-term</sup> contacts into close proximity (Fig. 6 and  
242 Supplementary Fig. 11). Moreover, Ame1/Okp1 and Mif2<sup>217-240\*9S-A\*</sup> competed for binding to  
243 Mtw1/Nnf1 (Fig. 3a)<sup>35</sup> but formed a nearly stoichiometric complex with *in vitro*  
244 phosphorylated wild-type Mif2\*, suggesting that phosphorylation of the Mif2<sup>217-240</sup> motif (Fig.  
245 3b) might facilitate the simultaneous stabilization of Mif2\* and Ame1 at the same MTW1c  
246 (Figs. 5e and 6)<sup>20</sup>.

247

248

249

## 250 Discussion

251 Our observation that increasing crosslink intensities correlate with shorter crosslink distances  
252 lead to the development of a quantitative XLMS approach, which applies inter-protein  
253 crosslinks to characterize protein binding interfaces beyond the detection of the protein  
254 connectivity. This study demonstrates the capacity of inter-protein crosslink intensities to  
255 simultaneously estimate  $K_D$  values of individual contacts in multi-protein assemblies ranging  
256 from 6 to 0.015  $\mu\text{M}$ . Notably, the subset of inter-links proximal to minimal binding interfaces  
257 yielded apparent  $K_D$  values that are in good agreement with values determined by ITC (Figs.  
258 2c and 3d). Moreover, the distance-intensity relation was exploited in the 'Relative Interface  
259 Propensity Index' to support the prediction of putative interface sequence regions, whose  
260 physiological importance was confirmed in cell viability assays.

261 To demonstrate the applicability of our workflow to datasets, which were not acquired as  
262 titration experiments for the purpose of this study, we analyzed the XLMS dataset of the histone  
263 H3 methyltransferase Polycomb repressive complex 2 (PRC2) (Fig. 6b)<sup>36</sup>. Based on crosslink  
264 intensities we showed that binding of methylated JARID2 increases the relative affinity of the  
265 second cofactor AEBP2 to the PRC2 complex (Fig. 6c, d), which is consistent with the  
266 observation of a compact active state upon methylation of JARID2 by electron microscopy<sup>36</sup>.  
267 In addition, the sequence areas, indicated by the RIPI blot, are in good agreement with the  
268 binding interfaces of the PRC2 subunit SUZ12 with the cofactors, JARID2 and AEBP2, which  
269 were obtained from electron microscopy density maps (Fig. 6e, f)<sup>36</sup>.

270

271 By applying the quantitative XLMS method to analyze the budding yeast kinetochore assembly  
272 at centromeric nucleosomes, we identified the interface of the phosphorylation-dependent  
273 Mif2:Ame1/Okp1 interaction at the inner kinetochore (Figs. 3a and b). The phosphorylation  
274 sites within the Mif2<sup>217-240</sup> motif established the Mif2:Ame1/Okp1 interaction *in vitro* (Fig. 5a)

275 and were required not only to generate a hub of Cse4 nucleosome binding motifs but might  
276 also induce the switch-like stabilization of Mif2 and Ame1 at the outer kinetochore MTW1  
277 complex phosphorylated at the Dsn1 subunit (Figs. 3a, 5e and 6). Together, phosphorylation  
278 of the outer kinetochore Dsn1 and the inner kinetochore Mif2 proteins resulted in a ~200-fold  
279 increase in Cse4 nucleosome binding affinity *in vitro* (Figs. 3 and 4) and expression of  
280 phosphorylation-ablative mutants resulted in synthetic lethality suggesting that the  
281 phosphorylation-induced cooperativity is important for kinetochore stabilization *in vivo*. This  
282 highlights the capacity of quantitative XLMS to detect the impact of two phosphorylation  
283 events on the cooperative stabilization of a macromolecular assembly by a sharp increase in  
284 binding affinities.

285 Although human and budding yeast kinetochores differ in subunit connectivity<sup>8</sup>, the human  
286 orthologue of the MTW1 complex, MIS12c, has been implicated in CENP-A stabilization at  
287 centromeres<sup>37</sup>. Moreover, we found that the Mif2:Okp1 interface is partially conserved in their  
288 human orthologues CENP-C:CENP-Q (Supplementary Fig. 16) and the CENP-C residue T667,  
289 which corresponds to Mif2 S226, shows a single nucleotide polymorphism, T667K, in  
290 malignant hepatic cancer cells<sup>38</sup>.

291

292 We demonstrated that quantitative XLMS facilitated the mechanistic characterization of  
293 protein complexes beyond a structural description by estimating protein affinities and their  
294 relative changes upon protein modification or ligand interaction. This quantitative XLMS  
295 method will significantly contribute to biological modeling at the molecular and cellular level  
296 and holds great promise for the development of diagnostic tools for studying the effects of drug  
297 interactions on protein complexes and the characterization of epitopes for protein therapeutics.

298

299

## 300 **Methods**

### 301 **Protein expression and purification of Spc24/25, MTW1c, Cnn1<sup>1-270</sup>, Ame1/Okp1, Clb2** 302 **and Mps1 from *E. coli***

303 For the expression of the budding yeast Spc24/25 complex in *E. coli*, the respective genes were  
304 amplified from genomic DNA and cloned into the pETDuet-1 vector (Novagen). Expression  
305 and purification of the Spc24/25 complex were performed as described previously<sup>15</sup>. In brief,  
306 pETDuet1-Spc24-6xHis/Spc25 was transformed into *E. coli* strain BL21 DE3 (EMD  
307 Millipore). Bacteria were grown in selective LB-medium to an OD<sub>600</sub> of 0.6 at 37 °C and  
308 protein expression was induced with 0.2 mM IPTG for 18 h at 18 °C. Cells were lysed in lysis  
309 buffer (30 mM HEPES, pH 7.5, 300 mM NaCl, 5% glycerol, 30 mM imidazole, Complete  
310 EDTA-free protease inhibitor [Roche]) and the cleared lysate was incubated with Ni-NTA  
311 agarose beads (Qiagen). The protein complex was eluted with buffer containing 30 mM HEPES  
312 pH 7.5, 150 mM NaCl, 0.01% NP40, 2% glycerol and 250 mM imidazole and further purified  
313 on a Superdex 200 HiLoad 16/600 column (GE Healthcare) in the gel filtration buffer (30 mM  
314 HEPES pH 7.5, 150 mM KCl and 5% glycerol).

315 The constructs for budding yeast Mtw1/Nnf1 (pETDuet-Mtw1-Nnf1-6xHis) and Dsn1/Nsl1  
316 (pST-39-Mtw1-Nsl1-6xHis-Dsn1) were kindly provided by S. Westermann<sup>15</sup>. For the  
317 phospho-mimetic version of MTW1c (Mtw1/Nnf1/Dsn1<sup>S240DS250D</sup>/Nsl1), the serine residues  
318 S240 and S250 in Dsn1 were mutated to aspartic acid using the Q5 site-directed mutagenesis  
319 kit (New England Biolabs) as described previously<sup>19,20</sup>. The plasmid containing Mtw1/Nnf1  
320 was transformed into *E. coli* Rosetta (DE3) strain (EMD Millipore), whereas Dsn1/Nsl1 was  
321 transformed into BL21 DE3 (EMD Millipore). Transformed bacteria were grown in selective  
322 LB medium at 37 °C to OD<sub>600</sub> 0.6-0.8 and protein expression was induced with 0.2 mM IPTG  
323 (Mtw1/Nnf1 expression) or 0.5 mM IPTG (Dsn1/Nsl1) at 18 °C for 18 h. Cells were lysed in  
324 lysis buffer (50 mM HEPES, pH 7.5, 400 mM NaCl, 5% glycerol, 20 mM imidazole, 1 mM

325 DTT, Complete EDTA-free protease inhibitor [Roche]) and the cleared lysate was incubated  
326 with Ni-NTA agarose beads (Qiagen). After several washing steps in wash buffer (50 mM  
327 HEPES, pH 7.5, 600 mM NaCl, 5% glycerol, 20 mM imidazole) the protein complex was  
328 recovered in elution buffer (50 mM HEPES pH 7.5, 150 mM NaCl, 5% glycerol, 300 mM  
329 imidazole). To reconstitute the MTW1c, fractions containing pure protein sub-complexes were  
330 subjected to size-exclusion chromatography (Superose 6 increase 10/300, GE Healthcare) in  
331 25 mM HEPES pH 7.5, 150 mM KCl, 5% glycerol and fractions containing reconstituted  
332 MTW1c were collected, flash-frozen in liquid nitrogen and stored at -80 °C.

333 The construct encoding Ame1-6xHis/Okp1 (pST39-Okp1-Ame1-6xHis) was kindly provided  
334 by S. Westermann<sup>15</sup>. Protein expression and purification in *E. coli* was essentially performed  
335 as described<sup>15</sup> with the modification that 25 mM HEPES buffer was used as buffer component  
336 in all purification steps and the final gel filtration was performed on a Superdex 200 HiLoad  
337 16/600 column (GE Healthcare) in 25 mM HEPES pH 7.5, 150 mM KCl, 5% glycerol.

338 For Mps1 expression and purification, the Mps1 coding sequence was cloned into pETDuet-1  
339 with an N-terminal 6xHis-tag. Protein expression and purification was performed as described  
340 for the MTW1c and the Ni-NTA eluate was desalted using a PD10 column (GE Healthcare) in  
341 desalting buffer (50 mM HEPES pH 7.5, 150 mM NaCl, 10% glycerol, 0.5 mM DTT).

342 The construct for budding yeast Cnn1<sup>1-270</sup> (pETDuet-6xHis- Cnn1<sup>1-270</sup>) was kindly provided by  
343 S. Westermann<sup>28</sup> and purified as described. After elution, the protein was further purified on  
344 a Superdex 200 HiLoad 16/600 column (GE Healthcare) in gel filtration buffer (25 mM HEPES  
345 pH 7.5, 150 mM KCl and 5% glycerol).

346

#### 347 **CDC28<sup>CDK1</sup> complex purification**

348 Reconstitution of the CDC28 complex, consisting of Clb2, Cdc28 and Cks1, could not be  
349 performed by the single expression of all partners from a single baculovirus in insect cells, as

350 Clb2 was degraded. To reconstitute the three subunit CDC28c, 1xStrep-tagged Clb2 was  
351 expressed and purified from *E. coli*, immobilized on Strep-Tactin beads (Qiagen) and incubated  
352 with cell lysate of baculovirus infected High Five™ cells expressing Cdc28 and Cks1, to  
353 assemble the three subunit CDC28c.

354 Full-length Clb2 was PCR amplified from budding yeast genomic DNA and cloned into  
355 pET-28 with an N-terminal 1xStrep-tag. pET28-1xStrep-Clb2 transformed *E. coli* Rosetta  
356 (DE3) (EMD Millipore) cells were grown in selective LB medium to OD<sub>600</sub> 0.6-0.8 and  
357 expression of Clb2 was induced by 0.4 mM IPTG at 18 °C for 18 h. Cells were resuspended in  
358 lysis buffer containing 50 mM HEPES pH 7.5, 150 mM KCl, 5% glycerol, 0.01% Tween, 1.5  
359 mM MgCl<sub>2</sub>, 1 mM DTT and complete EDTA-free protease inhibitor (Roche) and lysed by  
360 sonication. The cleared lysate was incubated with Strep-Tactin Superflow resin (Qiagen) for 1  
361 h at 4 °C. Immobilized Clb2 was washed with wash buffer (50 mM HEPES pH 7.5, 150 mM  
362 KCl, 5% glycerol, 1 mM DTT) and incubated with the cleared insect cell lysates containing  
363 recombinant Cdc28 and Cks1 for one hour at 4 °C. Beads were washed and the reconstituted  
364 CDC28 complex was recovered in elution buffer (50 mM HEPES pH 7.5, 300 mM KCl, 5%  
365 glycerol, 1 mM DTT, 10 mM biotin). The eluate was dialyzed in 50 mM HEPES pH 7.5, 150  
366 mM KCl, 10% glycerol) and flash-frozen aliquots were stored at -80 °C.

367

### 368 **Protein expression and purification from insect cells**

369 Open reading frames encoding the respective subunits were amplified from yeast genomic  
370 DNA and cloned into the pBIG1/2 vectors for insect cell expression according to the biGBac  
371 protocol <sup>39</sup>. Generation of recombinant viruses expressing single or multiple subunits was  
372 performed according to the MultiBac system <sup>40</sup>.

373 Mif2-6xHis-6xFlag wild-type and mutant proteins were expressed in High Five™ cells for  
374 three days at 27 °C. Cells were lysed in lysis buffer (30 mM HEPES pH 7.5, 400 mM NaCl,



375 20 mM imidazole, 5% glycerol, 125 U/ml benzonase (Merck), 1 mM MgCl<sub>2</sub> and complete  
376 protease inhibitor cocktail [Roche]) using a dounce homogenizer. The cleared lysate was  
377 incubated with Ni-NTA resin (Qiagen) washed with lysis buffer (without protease inhibitor)  
378 and eluted in 30 mM HEPES pH 7.5, 150 mM NaCl, 5% glycerol and 250 mM imidazole.  
379 6xHis-Cdc5<sup>Pik1</sup> was expressed and purified from insect cells as described for Mif2 with the  
380 following modifications. Cells were lysed in lysis buffer (50 mM HEPES pH 7.5, 150 mM  
381 NaCl, 5% glycerol, 125 U/ml benzonase (Merck), 1 mM MgCl<sub>2</sub> and complete protease  
382 inhibitor cocktail [Roche]) using a dounce homogenizer. The cleared lysate was incubated with  
383 Ni-NTA resin (Qiagen), washed with 50 mM HEPES pH 7.5, 300 mM NaCl, 20 mM imidazole,  
384 5% glycerol and eluted in 50 mM HEPES pH 7.5, 150 mM NaCl, 5% glycerol and 250 mM  
385 imidazole. Peak fractions were combined and the buffer was exchanged using a PD10 column  
386 (GE Healthcare) in desalting buffer (50 mM HEPES pH 7.5, 120 mM NaCl, 3% glycerol).  
387 Sli15ΔN228-2xStrep/Ipl1 complex was purified from insect cells as described previously<sup>14</sup>.  
388 Insect cell lysates containing expressed untagged Cdc28 and Cks1 were prepared as described  
389 above in lysis buffer (50 mM HEPES, pH 7.5, 150 mM KCl, 5 % glycerol, 0.01% Tween and  
390 complete EDTA-free protease inhibitors [Roche]) and the cleared lysates were used to  
391 assemble the trimeric CDC28 complex with 1xStrep-Clb2 purified from *E. coli*.  
392 For *in vitro* binding and quantitative crosslinking experiments Cdc5<sup>Pik1</sup> phosphorylated Mif2  
393 was generated according to the following procedure. 1 mg 6xHis-tag purified Mif2-6xHis-  
394 6xFlag was immobilized on anti-FlagM2 agarose beads (Merck) for 1 h, at 4 °C. Unbound  
395 protein was removed by washing 2x with wash buffer (30 mM HEPES pH 7.5, 150 mM NaCl,  
396 5% glycerol). Subsequently, Mif2 was treated for 2 h at 30 °C with lambda-phosphatase (*New*  
397 *England Biolabs*) according to the manufacturer's instruction. The dephosphorylation reaction  
398 was stopped by washing 1x in wash buffer supplemented with Halt<sup>TM</sup> Phosphatase Inhibitor  
399 Cocktail (Thermo Fisher) and 2x without phosphatase inhibitors. Mif2 was re-phosphorylated



400 by adding 50  $\mu\text{g}$  Cdc5<sup>Plk1</sup> in the presence of 2.5 mM MgCl<sub>2</sub> and 1 mM ATP at 30 °C. The kinase  
401 reaction was stopped by washing 2x in wash buffer and Mif2 was recovered in elution buffer  
402 (30 mM HEPES pH 7.5, 150 mM NaCl, 5% glycerol, 1 mg/ml 3xFLAG-peptide). For  
403 quantitative crosslinking experiments the eluate was further purified on a Superdex 200 HiLoad  
404 16/60 column (GE Healthcare) in gelfiltration buffer (30 mM HEPES pH 7.5, 150 mM KCl  
405 and 5% glycerol).

406

#### 407 ***In vitro* binding assay of Mif2 wild-type and mutant proteins to Ame1/Okp1**

408 To analyze the interaction of Ame1-6xHis/Okp1 with Mif2-6xHis-6xFlag wild-type and  
409 mutant proteins *in vitro*, 10  $\mu\text{M}$  Cdc5<sup>Plk1</sup> re-phosphorylated Mif2 protein (M3) was  
410 immobilized on anti-FlagM2 beads (Merck) and incubated with 25  $\mu\text{M}$  Ame1/Okp1 complex  
411 in binding buffer (50 mM HEPES pH 7.5, 150 mM NaCl, 3% glycerol, 0.01% Tween 20) for  
412 1 h at 4 °C and 1200 rpm in a thermomixer (Eppendorf). Unbound protein was removed by  
413 washing 2x with high salt buffer (50 mM HEPES pH 7.5, 300 mM NaCl, 3% glycerol, 0.01%  
414 Tween 20) and 1x with binding buffer. Bound protein was eluted in binding buffer containing  
415 1 mg/ml 3xFLAG peptide (Ontores).

416 To test the binding of Mif2 and Ame1/Okp1 to Mtw1/Nnf1, 10  $\mu\text{M}$  Mif2-6xHis-6xFlag or Mif2  
417 S217-240A-6xHis-6xFlag was incubated with 20  $\mu\text{M}$  Mtw1-Nnf1-6xHis and immobilized on  
418 anti-FlagM2 beads (Merck) for 1 h at 4 °C and 1200 rpm. The beads were washed 1x with high  
419 salt buffer and 1x with binding buffer. The complex was subsequently incubated with 10  $\mu\text{M}$   
420 Ame1/Okp1 complex in binding buffer for 1 h at 4 °C and 1200 rpm. Unbound Ame1/Okp1  
421 was removed by washing 2x with high salt buffer and 1x with binding buffer. Proteins were  
422 eluted in a buffer containing 50 mM HEPES pH 7.5, 150 mM NaCl, 5% glycerol and 1 mg/ml  
423 3xFLAG peptide (Ontores). The input and bound fractions were separated by SDS-PAGE and  
424 proteins were visualized by Coomassie brilliant blue staining.

425 To analyze the binding of untreated, dephosphorylated or re-phosphorylated Mif2-6xHis-  
426 6xFlag wild-type to Ame1-6xHis/Okp1 *in vitro*, 10  $\mu$ M Mif2 protein per condition was  
427 immobilized on anti-FlagM2 agarose beads (Merck) for 1 h at 4 °C and 1200 rpm in a  
428 thermomixer. The beads were washed 3x with wash buffer (50 mM HEPES pH 7.5, 150 mM  
429 NaCl, 3% glycerol, 0.01% Tween 20) and an aliquot of the untreated sample was removed.  
430 Anti-Flag immobilized Mif2-6xHis-6xFlag was then treated with lambda-phosphatase (*New*  
431 *England Biolabs*) according to the manufacturer's instruction and incubated for 2 h at 30 °C  
432 and 1200 rpm in a thermomixer. The dephosphorylation reaction was stopped by washing 1x  
433 in wash buffer supplemented with Halt<sup>TM</sup> Phosphatase Inhibitor Cocktail (ThermoFisher) and  
434 2x without phosphatase inhibitors. An aliquot of the lambda-phosphatase treated sample was  
435 removed and the rest was aliquoted and used in *in vitro* kinase assays with CDC28c, Cdc5,  
436 Sli15/Ipl1, Mps1 or combinations thereof in the presence of 2.5 mM MgCl<sub>2</sub> and 1 mM ATP  
437 for 30 min at 30 °C and 1200 rpm. The kinase reaction was stopped by washing 1x with high  
438 salt buffer and 2x with wash buffer. The binding of the untreated, dephosphorylated and re-  
439 phosphorylated Mif2-6xHis-6xFlag samples to Ame1-6His/Okp1 was analyzed as described.  
440 Quantification of the ratios of bound protein to the bait was performed by using ImageJ<sup>41</sup> from  
441 three independent experimental set-ups.

442

#### 443 ***In vitro* reconstitution of Cse4- and H3-containing nucleosome core particles (NCPs)**

444 Octameric Cse4 and H3 containing nucleosomes were *in vitro* reconstituted from budding yeast  
445 histones which were recombinantly expressed in *E. coli* and assembled on the 147 bp  
446 'Widom601' nucleosome positioning sequence according to a modified protocol<sup>42,43</sup>.

447

448

449

450 **Protein complex titration, chemical crosslinking and mass spectrometry**

451 The purified proteins and protein complexes were titrated applying a series of molar ratios and  
452 incubated for 45 min at room temperature to allow complex formation. For example, the  
453 titration of the Cnn1<sup>1-270</sup>-Spc24/25 complex was performed by incubating Cnn1<sup>1-270</sup> with the  
454 Spc24/25 dimer at molar ratios of 0.05, 0.15, 0.25, 0.55, 0.60, 0.65, 0.75, 0.80, 0.85, 0.90, 0.95,  
455 1.0, 1.25, 1.5 and 2.0 in a final volume of 95  $\mu$ l at 25 °C. Subsequently, protein complexes  
456 were crosslinked by the addition of an equimolar mixture of isotopically light (hydrogen) and  
457 heavy (deuterium) labelled bis(sulfosuccinimidyl) 2,2,4,4-glutarate (BS2G-d<sub>0</sub>/d<sub>6</sub>) (Creative  
458 Molecules) at a final concentration of 0.5-0.75 mM at 30 °C for 2 min. The crosslinking  
459 reaction was quenched by adding ammonium bicarbonate to a final concentration of 100 mM  
460 for 20 min at 30 °C. Proteins were diluted by adding 2 volumes of 8 M urea, reduced by 5 mM  
461 TCEP (Thermo Fisher) at 35 °C for 15 min and alkylated by incubating with 10 mM  
462 iodoacetamide (Sigma-Aldrich) at room temperature for 30 min in the dark. Proteins were  
463 digested with Lys-C (1:50 (w/w), Wako Pure Chemical Industries) for 2 h at 35 °C and 1300  
464 rpm, diluted to 1 M urea with 50 mM ammonium bicarbonate and digested with trypsin (1:50  
465 (w/w), Promega) overnight at 35 °C and 1300 rpm. Peptides were acidified by adding  
466 trifluoroacetic acid to a final concentration of 1% and purified by reversed phase  
467 chromatography using C18 cartridges (Sep-Pak, Waters). Crosslinked peptides were enriched  
468 by size exclusion chromatography on a Superdex Peptide PC 3.2/30 column (GE Healthcare)  
469 using water/acetonitrile/TFA (77.4/22.5/0.1, v/v/v) as mobile phase at a flow rate of 50  $\mu$ l/min.  
470 Fractions containing crosslinked peptides were analyzed by liquid chromatography coupled to  
471 tandem mass spectrometry (LC-MS/MS) using an EASY-nLC 1200 and an LTQ-Orbitrap Elite  
472 mass spectrometer (Thermo Fisher). Peptides were injected onto a 15 cm x 0.075 mm i.d.  
473 Acclaim™ PepMap™ C18 column (2  $\mu$ m particle size, 100 Å pore size) and separated at a  
474 flow rate of 300 nl/min using the following gradient: 0-5 min 3% B and 5-65 min 3-35% B

475 (acetonitrile/water/formic acid, 98:2:0.1). The mass spectrometer was operated in data-  
476 dependent mode, selecting up to 10 precursors from a MS1 scan (resolution 60,000) in the  
477 range of  $m/z$  350–1800 for collision-induced dissociation excluding singly and doubly charged  
478 precursor ions and precursors of unknown charge states. Dynamic exclusion was activated with  
479 a repeat count of 1, exclusion duration of 30 s, list size of 300, and a mass window of  $\pm 50$  ppm.  
480 Fragment ions were detected at low resolution in the linear ion trap.

481

### 482 **Identification of peptide crosslink spectra**

483 Raw spectra were converted to mzXML format using MSConvert<sup>44</sup> and crosslink spectra were  
484 searched and identified using xQuest/XProphet<sup>24</sup>. Peptide spectrum matches were performed  
485 against a database including the subunits of the respective complex (Spc24, Spc25, Cnn1 or  
486 Mif2, Ame1/Okp1, Cse4-NCP, Mtw1/Nnf1/Dsn1/Nsl1) and 22 *E. coli* decoy protein  
487 sequences. A maximum of two trypsin missed cleavages and peptide lengths between 4 and 45  
488 amino acids were allowed. Carbamidomethyl-Cys was set as a fixed modification and a mass  
489 shift of 96.0211296 for intra-/inter-protein crosslink candidates with an additional shift of  
490 6.03705 to account for crosslinks with the heavy version of BS2. A precursor mass tolerance  
491 of  $\pm 10$  ppm was used and a tolerance of 0.2 and 0.3 Da for linear and crosslinked fragment  
492 ions, respectively. The search was performed in the 'ion-tag' mode. Identifications were filtered  
493 by applying a maximum FDR of 5%, precursor errors of  $\pm 5.0$  ppm, a maximum delta score of  
494 0.9 and a minimum of 3 fragment ion matches per peptide. The final identification tables were  
495 downloaded as xtract.csv files from the xQuest/xProphet visualization tool.

496

497

498

499 **Quantification of peptide-peptide crosslinks and site-site crosslinks using the TOPP-qXL**  
500 **pipeline**

501 Quantification was performed with an in-house developed workflow based on the OpenMS  
502 software version 2.0<sup>25</sup>. All scripts as well as the xtract.csv files to run the python script  
503 'toppXLquant.py' (C:/Users/.../Scripts/TOPPqXL/bin/) are provided in the 'Scripts.zip'  
504 folder. The pipeline starts with the conversion of the identification tables in the xtract.csv files  
505 to idXML format using our script 'xtractToIdXML.py'. The files were saved and the workflow  
506 'basic\_xlquant.toppas' (C:/Users/.../Scripts/TOPP-qXL/workflows) was opened in the  
507 OpenMS framework<sup>25</sup>. The '\*.idXML' and '\*.mzXML' files are uploaded as input files of the  
508 workflow. During execution of the workflow, raw files in the mzXML format were converted  
509 to mzML using the FileConverter function with default parameters except for the filtering of  
510 MS2 scans and MS1 peaks with intensities <100.0. Peak features in the mzML files and their  
511 respective profile chromatograms were extracted with the FeatureFinderAlgorithmPicked  
512 function from OpenMS. Parameters fed to this tool are found in the file  
513 'ffcentroided\_params.ini'. Detected features were annotated with their putative peptide  
514 identifications in the idXML files using the IDMapper function with an m/z tolerance of  $\pm 7$   
515 ppm and RT tolerance of  $\pm 10$  s. Retention times between runs were aligned using the  
516 MapAlignerIdentification function with default parameters. Finally, consensus tables were  
517 generated using the FeatureLinkerUnlabeled function with default parameters and converted  
518 to .csv format with the TextExporter function. The intensities of the unique peptide-peptide  
519 crosslink ions were summarized to site-site crosslink intensities using the in-house script  
520 'csvToToppXLqTSV.py' (provided in: C:/Users/.../ Scripts/TOPPqXL/bin).

521

522

523 **Estimation of the apparent equilibrium dissociation constant ( $K_D$ ) based on crosslink**  
524 **intensities**

525 Site-site crosslink intensities were loaded and analyzed in the statistical environment R  
526 (<https://www.r-project.org>). Technical replicates were averaged with non-assigned values  
527 being ignored at this step. The intensities of peptides seen in >1 SEC fraction were summed up  
528 and peptide-peptide crosslinks were summarized to site-site crosslinks by addition of their  
529 intensities. The intensities of the subunit whose concentration was constant in all titrations were  
530 applied to normalize the intensities between runs. Finally, a linear model was fitted between  
531 the initial concentrations of the varying subunit and the median intensity of its intra-protein  
532 crosslinks. This linear relation was used to estimate the concentration of the formed complex  
533 from the median intensity of the inter-protein crosslinks. Subsequently, the  $K_D$  was calculated  
534 as:

$$535 \quad Kd = \frac{(A_{init_{conc}} - A_{conc}) * (B_{init_{conc}} - B_{conc})}{(A:x:B)_{conc}}$$

536 where  $A$  represents the subunit whose concentration varies,  $B$  the subunit whose concentration  
537 remains constant and  $A:x:B$  the complex. The initial concentrations of  $A$  and  $B$  were  
538 recalculated based on the linear relation of concentration and intensity. For each titration step  
539 a  $K_D$  value was calculated and the mean and standard deviation of these values were reported.

540 We also applied the *Scatchard plot*<sup>29</sup> to estimate the  $K_D$  by plotting the linear relation of  
541 'fraction of B bound over concentration of free A' (y-axis) versus 'fraction of B bound' (x-axis).  
542 This approach indicates the  $K_D$  as the negative inverse of the slope as well as the inverse of the  
543 intersection coefficient (Fig. 2b).

544 To calculate the apparent  $K_D$  values based on the steady state equilibrium equation the R script  
545 was run according to the following procedure. The scripts (C:/Users/.../Scripts/R-Script) were  
546 opened in the R environment. To analyze the Cnn1:x:Spc24/25 titration the  
547 'CnnSPC\_Kd\_Est.R' script and for the analysis of the Mif2:Ame1/Okp1:MTW1c:x:Cse4-NCP

548 titration the ‘MTW1cMifAO\_CSE4-NCP\_Kd\_Est.R’ script were applied. The location of the  
549 input files was defined in the working directory in `setwd("C:/Users/.../")`. The input file name  
550 was defined in ‘fname’ (e.g.: `fname = "1.1-MIFNUC_F restraints.tsv"`). Subsequently, the  
551 default settings of the calculation parameters, as described above, can be altered by following  
552 the instructions in the code. Executing the script shows the results table (‘kdtbl2’) which  
553 indicates the  $K_D$  values of each titration step and the mean (KD) and standard deviation (SD).  
554 At this step outliers that exceed the double SD are excluded and the mean  $K_D$  (KD2) and  
555 standard deviation (SD2) are recalculated. In addition, several exploratory plots are generated.  
556 (1) Crosslink intensities per protein:x:protein pair (median) before normalization  
557 (Supplementary Figs. 4a, 5, 8a, 8c, 8e, 8g and 10a). (2) Correlation of crosslink intensities  
558 within protein:x:protein pairs. (3) Crosslink intensities per protein:x:protein pair (median) after  
559 normalization (Supplementary Figs. 4b, 8b, 8d, 8f, 8h and 10b). (4) Correlation of crosslink  
560 intensities between experiments and between crosslinks. (5) Linear regression between  
561 crosslink intensity and protein concentration. The linear regression model is used to estimate  
562 the apparent  $K_D$  values. The statistical analysis of the apparent  $K_D$  values for each interaction  
563 is summarized in ‘kdtbl2’.

564

### 565 **Determination of the Relative Interface Propensity Index (RIPI)**

566 Peptide-peptide crosslink intensities were summarized to site-site intensities, by summing up  
567 all restraint intensities involving the specific lysine residue. This total sum includes mono-  
568 links, loop-links, intra- and inter-protein crosslinks. Next, the site-site intensity of the inter-  
569 protein crosslinks from a specific dimer interaction was divided by the total sum. The resulting  
570 value was called the Relative Interface Propensity Index (RIPI) of a crosslinked residue. Lysine  
571 sites, which were not identified in inter-protein crosslinks, were assigned a RIPI value equal to  
572 the minimum RIPI in the set, in order to avoid infinite values for the plotted inversed RIPIs.

573 Sequence conservation in the RIPI plots was computed by using PSIBlast against the  
574 UNIREF90 database. Only residue positions with conservation above the 80% quantile within  
575 the protein sequence were plotted.

576 Secondary structure and rASA (relative accessible surface area) were predicted using the  
577 SPIDER2 software <sup>45</sup> against the UNIREF90 database. The fasta protein sequences and the  
578 PSSMs (Position-Specific Scoring Matrix) obtained by PSIBlast were used as input for the  
579 SPIDER2 software. Residues were considered to have low accessibility if their rASA was  
580 below 40%. Residues were considered to have low disorder if their IUPred index was below  
581 0.25 in a scale of 0 to 1.

582 Real interface residues were extracted from PDB models if applicable. Real binding interfaces  
583 were identified by a residue-residue distance between the interacting proteins of below 4.5 Å.  
584 The distances were measured from any heavy atom in one residue to any heavy atom in the  
585 other residue.

586

### 587 **Yeast strains and methods**

588 All yeast strains used in this study were created in the S288c background and are listed in  
589 Supplementary Table 8. The generation of yeast strains and yeast methods were performed by  
590 standard procedures. The anchor-away analysis was performed as described previously <sup>46</sup>.

591 For anchor-away rescue experiments, the Mif2 promoter (1 kb) and coding sequence were PCR  
592 amplified from yeast genomic DNA and cloned with a 6xHis-7xFlag tag PCR fragment into  
593 vector pRS313 via the Gibson assembly reaction <sup>47</sup>. The deletion mutants were generated using  
594 the Q5 site-directed mutagenesis kit (New England Biolabs) and phospho-ablative mutants  
595 were constructed by Gibson assembly of the corresponding mutant gene fragments (IDT). The  
596 rescue constructs were transformed into a Mif2 anchor-away strain (*Mif2-FRB*) or a *Mif2-*  
597 *FRB/dsn1<sup>S240AS250AS264A</sup>* mutant strain (Supplementary Table 8) and cell growth was tested in



598 1:10 serial dilutions on YPD plates in the absence or presence of rapamycin (1 mg/ml) at 30  
599 °C for 3 days.

600

### 601 **Western blot analysis**

602 The levels of proteins ectopically expressed in yeast were probed by western blot analysis as  
603 described previously<sup>14</sup>. For western blot analysis an equivalent of 10 OD<sub>600</sub> of cells  
604 logarithmically grown in selective liquid culture was collected by centrifugation at 3140 x g  
605 for 5 min at room temperature and the pellet was washed once with aqua dest. For protein  
606 extraction, the pellet was resuspended in 1 ml ice-cold 10% trichloroacetic acid and incubated  
607 on ice for 1 h. Samples were pelleted at 4°C and 20000x g for 10 min and washed twice with  
608 ice-cold 95% ethanol. Pellets were air-dried and resuspended in 100 µl 1x SDS-PAGE sample  
609 buffer containing 75 mM Tris (pH 8.8). Samples were boiled (10 min, 95°C) and centrifuged  
610 at 10800 x g for 3 min at room temperature and supernatants were separated on 10% SDS-  
611 PAGE gels. Immunoblotting was performed with Anti-FLAG M2 (Sigma-Aldrich) or Anti-  
612 PGK1 (ThermoFisher) antibodies and visualized by HRP-conjugated anti-mouse secondary  
613 antibodies (Santa Cruz).

614

### 615 **Amino acid sequence alignment**

616 Multiple sequence alignments of *S. cerevisiae* Mif2 and Okp1 amino acid sequences with their  
617 respective mammalian orthologues CENP-C or CENP-Q were performed with Clustal  
618 Omega<sup>48</sup> (<https://www.ebi.ac.uk/Tools/msa/clustalo/>).

619

## 620 References

621

- 622 1 O'Reilly, F. J. & Rappsilber, J. Cross-linking mass spectrometry: methods and applications in  
623 structural, molecular and systems biology. *Nat Struct Mol Biol* **25**, 1000-1008,  
624 doi:10.1038/s41594-018-0147-0 (2018).
- 625 2 Rout, M. P. & Sali, A. Principles for Integrative Structural Biology Studies. *Cell* **177**, 1384-  
626 1403, doi:10.1016/j.cell.2019.05.016 (2019).
- 627 3 Fischer, L., Chen, Z. A. & Rappsilber, J. Quantitative cross-linking/mass spectrometry using  
628 isotope-labelled cross-linkers. *J Proteomics* **88**, 120-128, doi:10.1016/j.jprot.2013.03.005  
629 (2013).
- 630 4 Schmidt, C. *et al.* Comparative cross-linking and mass spectrometry of an intact F-type  
631 ATPase suggest a role for phosphorylation. *Nat Commun* **4**, 1985, doi:10.1038/ncomms2985  
632 (2013).
- 633 5 Walzthoeni, T. *et al.* xTract: software for characterizing conformational changes of protein  
634 complexes by quantitative cross-linking mass spectrometry. *Nat Methods* **12**, 1185-1190,  
635 doi:10.1038/nmeth.3631 (2015).
- 636 6 Rossi, A. M. & Taylor, C. W. Analysis of protein-ligand interactions by fluorescence  
637 polarization. *Nat Protoc* **6**, 365-387, doi:10.1038/nprot.2011.305 (2011).
- 638 7 Biggins, S. The composition, functions, and regulation of the budding yeast kinetochore.  
639 *Genetics* **194**, 817-846, doi:10.1534/genetics.112.145276 (2013).
- 640 8 Musacchio, A. & Desai, A. A Molecular View of Kinetochore Assembly and Function. *Biology*  
641 (*Basel*) **6**, doi:10.3390/biology6010005 (2017).
- 642 9 Akiyoshi, B. *et al.* Tension directly stabilizes reconstituted kinetochore-microtubule  
643 attachments. *Nature* **468**, 576-579, doi:10.1038/nature09594 (2010).
- 644 10 Powers, A. F. *et al.* The Ndc80 kinetochore complex forms load-bearing attachments to  
645 dynamic microtubule tips via biased diffusion. *Cell* **136**, 865-875,  
646 doi:10.1016/j.cell.2008.12.045 (2009).
- 647 11 Schleiffer, A. *et al.* CENP-T proteins are conserved centromere receptors of the Ndc80  
648 complex. *Nat Cell Biol* **14**, 604-613, doi:10.1038/ncb2493 (2012).
- 649 12 van Hooff, J. J., Tromer, E., van Wijk, L. M., Snel, B. & Kops, G. J. Evolutionary dynamics of the  
650 kinetochore network in eukaryotes as revealed by comparative genomics. *EMBO Rep* **18**,  
651 1559-1571, doi:10.15252/embr.201744102 (2017).
- 652 13 Anedchenko, E. A. *et al.* The kinetochore module Okp1(CENP-Q)/Ame1(CENP-U) is a reader  
653 for N-terminal modifications on the centromeric histone Cse4(CENP-A). *EMBO J* **38**,  
654 doi:10.15252/emj.201898991 (2019).
- 655 14 Fischbock-Halwachs, J. *et al.* The COMA complex interacts with Cse4 and positions Sli15/Ipl1  
656 at the budding yeast inner kinetochore. *Elife* **8**, doi:10.7554/eLife.42879 (2019).
- 657 15 Hornung, P. *et al.* A cooperative mechanism drives budding yeast kinetochore assembly  
658 downstream of CENP-A. *J Cell Biol* **206**, 509-524, doi:10.1083/jcb.201403081 (2014).
- 659 16 Xiao, H. *et al.* Molecular basis of CENP-C association with the CENP-A nucleosome at yeast  
660 centromeres. *Genes Dev* **31**, 1958-1972, doi:10.1101/gad.304782.117 (2017).
- 661 17 Gascoigne, K. E. & Cheeseman, I. M. CDK-dependent phosphorylation and nuclear exclusion  
662 coordinately control kinetochore assembly state. *J Cell Biol* **201**, 23-32,  
663 doi:10.1083/jcb.201301006 (2013).
- 664 18 Hara, M. & Fukagawa, T. Dynamics of kinetochore structure and its regulations during  
665 mitotic progression. *Cell Mol Life Sci*, doi:10.1007/s00018-020-03472-4 (2020).

- 666 19 Akiyoshi, B., Nelson, C. R. & Biggins, S. The aurora B kinase promotes inner and outer  
667 kinetochore interactions in budding yeast. *Genetics* **194**, 785-789,  
668 doi:10.1534/genetics.113.150839 (2013).
- 669 20 Dimitrova, Y. N., Jenni, S., Valverde, R., Khin, Y. & Harrison, S. C. Structure of the MIND  
670 Complex Defines a Regulatory Focus for Yeast Kinetochore Assembly. *Cell* **167**, 1014-1027  
671 e1012, doi:10.1016/j.cell.2016.10.011 (2016).
- 672 21 Petrovic, A. *et al.* Structure of the MIS12 Complex and Molecular Basis of Its Interaction with  
673 CENP-C at Human Kinetochores. *Cell* **167**, 1028-1040 e1015, doi:10.1016/j.cell.2016.10.005  
674 (2016).
- 675 22 Lera, R. F. *et al.* Plk1 protects kinetochore-centromere architecture against microtubule  
676 pulling forces. *EMBO Rep* **20**, e48711, doi:10.15252/embr.201948711 (2019).
- 677 23 Herzog, F. *et al.* Structural probing of a protein phosphatase 2A network by chemical cross-  
678 linking and mass spectrometry. *Science* **337**, 1348-1352, doi:10.1126/science.1221483  
679 (2012).
- 680 24 Walzthoeni, T. *et al.* False discovery rate estimation for cross-linked peptides identified by  
681 mass spectrometry. *Nat Methods* **9**, 901-903, doi:10.1038/nmeth.2103 (2012).
- 682 25 Rost, H. L. *et al.* OpenMS: a flexible open-source software platform for mass spectrometry  
683 data analysis. *Nat Methods* **13**, 741-748, doi:10.1038/nmeth.3959 (2016).
- 684 26 Iacobucci, C. *et al.* First Community-Wide, Comparative Cross-Linking Mass Spectrometry  
685 Study. *Anal Chem* **91**, 6953-6961, doi:10.1021/acs.analchem.9b00658 (2019).
- 686 27 Jennebach, S., Herzog, F., Aebersold, R. & Cramer, P. Crosslinking-MS analysis reveals RNA  
687 polymerase I domain architecture and basis of rRNA cleavage. *Nucleic acids research* **40**,  
688 5591-5601, doi:10.1093/nar/gks220 (2012).
- 689 28 Malvezzi, F. *et al.* A structural basis for kinetochore recruitment of the Ndc80 complex via  
690 two distinct centromere receptors. *EMBO J* **32**, 409-423, doi:10.1038/emboj.2012.356  
691 (2013).
- 692 29 Scatchard, G. THE ATTRACTIONS OF PROTEINS FOR SMALL MOLECULES AND IONS. *Ann NY*  
693 *Acad Sci*, 660-672, doi:10.1111/j.1749-6632.1949.tb27297.x (1949).
- 694 30 Hinshaw, S. M. & Harrison, S. C. The structure of the Ctf19c/CCAN from budding yeast. *Elife*  
695 **8**, doi:10.7554/eLife.44239 (2019).
- 696 31 Kato, H. *et al.* A conserved mechanism for centromeric nucleosome recognition by  
697 centromere protein CENP-C. *Science* **340**, 1110-1113, doi:10.1126/science.1235532 (2013).
- 698 32 Emanuele, M. J. *et al.* Aurora B kinase and protein phosphatase 1 have opposing roles in  
699 modulating kinetochore assembly. *J Cell Biol* **181**, 241-254, doi:10.1083/jcb.200710019  
700 (2008).
- 701 33 Yang, Y. *et al.* Phosphorylation of HsMis13 by Aurora B kinase is essential for assembly of  
702 functional kinetochore. *J Biol Chem* **283**, 26726-26736, doi:10.1074/jbc.M804207200 (2008).
- 703 34 Yan, K. *et al.* Structure of the inner kinetochore CCAN complex assembled onto a  
704 centromeric nucleosome. *Nature* **574**, 278-282, doi:10.1038/s41586-019-1609-1 (2019).
- 705 35 Killinger, K. *et al.* Auto-inhibition of Mif2/CENP-C ensures centromere-dependent  
706 kinetochore assembly in budding yeast. *EMBO J*, e102938, doi:10.15252/embj.2019102938  
707 (2020).
- 708 36 Kasinath, V. *et al.* Structures of human PRC2 with its cofactors AEBP2 and JARID2. *Science*  
709 **359**, 940-944, doi:10.1126/science.aar5700 (2018).
- 710 37 Kline, S. L., Cheeseman, I. M., Hori, T., Fukagawa, T. & Desai, A. The human Mis12 complex is  
711 required for kinetochore assembly and proper chromosome segregation. *J Cell Biol* **173**, 9-  
712 17, doi:10.1083/jcb.200509158 (2006).

- 713 38 Wu, T. J. *et al.* A framework for organizing cancer-related variations from existing databases,  
714 publications and NGS data using a High-performance Integrated Virtual Environment (HIVE).  
715 *Database (Oxford)* **2014**, bau022, doi:10.1093/database/bau022 (2014).
- 716 39 Weissmann, F. *et al.* biGBac enables rapid gene assembly for the expression of large  
717 multisubunit protein complexes. *Proceedings of the National Academy of Sciences of the*  
718 *United States of America* **113**, E2564-2569, doi:10.1073/pnas.1604935113 (2016).
- 719 40 Trowitzsch, S., Bieniossek, C., Nie, Y., Garzoni, F. & Berger, I. New baculovirus expression  
720 tools for recombinant protein complex production. *J Struct Biol* **172**, 45-54,  
721 doi:10.1016/j.jsb.2010.02.010 (2010).
- 722 41 Schindelin, J. *et al.* Fiji: an open-source platform for biological-image analysis. *Nat Methods*  
723 **9**, 676-682, doi:10.1038/nmeth.2019 (2012).
- 724 42 Turco, E., Gallego, L. D., Schneider, M. & Kohler, A. Monoubiquitination of histone H2B is  
725 intrinsic to the Bre1 RING domain-Rad6 interaction and augmented by a second Rad6-  
726 binding site on Bre1. *J Biol Chem* **290**, 5298-5310, doi:10.1074/jbc.M114.626788 (2015).
- 727 43 Shim, Y., Duan, M. R., Chen, X., Smerdon, M. J. & Min, J. H. Polycistronic coexpression and  
728 nondenaturing purification of histone octamers. *Analytical biochemistry* **427**, 190-192,  
729 doi:10.1016/j.ab.2012.05.006 (2012).
- 730 44 Chambers, M. C. *et al.* A cross-platform toolkit for mass spectrometry and proteomics. *Nat*  
731 *Biotechnol* **30**, 918-920, doi:10.1038/nbt.2377 (2012).
- 732 45 Yang, Y. *et al.* SPIDER2: A Package to Predict Secondary Structure, Accessible Surface Area,  
733 and Main-Chain Torsional Angles by Deep Neural Networks. *Methods Mol Biol* **1484**, 55-63,  
734 doi:10.1007/978-1-4939-6406-2\_6 (2017).
- 735 46 Haruki, H., Nishikawa, J. & Laemmli, U. K. The anchor-away technique: rapid, conditional  
736 establishment of yeast mutant phenotypes. *Molecular cell* **31**, 925-932,  
737 doi:10.1016/j.molcel.2008.07.020 (2008).
- 738 47 Gibson, D. G. *et al.* Enzymatic assembly of DNA molecules up to several hundred kilobases.  
739 *Nat Methods* **6**, 343-345, doi:10.1038/nmeth.1318 (2009).
- 740 48 Sievers, F. *et al.* Fast, scalable generation of high-quality protein multiple sequence  
741 alignments using Clustal Omega. *Molecular systems biology* **7**, 539,  
742 doi:10.1038/msb.2011.75 (2011).

743

744

745

746

747

748

749

750

751

## 752 **Acknowledgements**

753 We thank Ruedi Aebersold, Stefan Westermann and Alexander Leitner for comments on the  
754 manuscript. GH and CK were funded by the Graduate School GRK 1721 and MP was  
755 supported by the Graduate School Quantitative Biosciences Munich of the German Research  
756 Foundation (DFG). FH was supported by the European Research Council (ERC-StG no.  
757 638218), the Human Frontier Science Program (RGP0008/2015), by the Bavarian Research  
758 Center of Molecular Biosystems and by an LMU excellent junior grant.

759 Data and materials availability: The mass spectrometry raw data was uploaded to the PRIDE  
760 Archive. The access information for reviewers is Project Name: Quantitative Crosslinking and  
761 Mass Spectrometry Detects Phosphorylation-Induced Kinetochores Stabilization, Project  
762 accession: PXD020094, Username: [reviewer83353@ebi.ac.uk](mailto:reviewer83353@ebi.ac.uk), Password: JFeuElbD.

763

764

765

766

767

768

769

770

771

772

773

774

775

776

777 **Fig. 1**

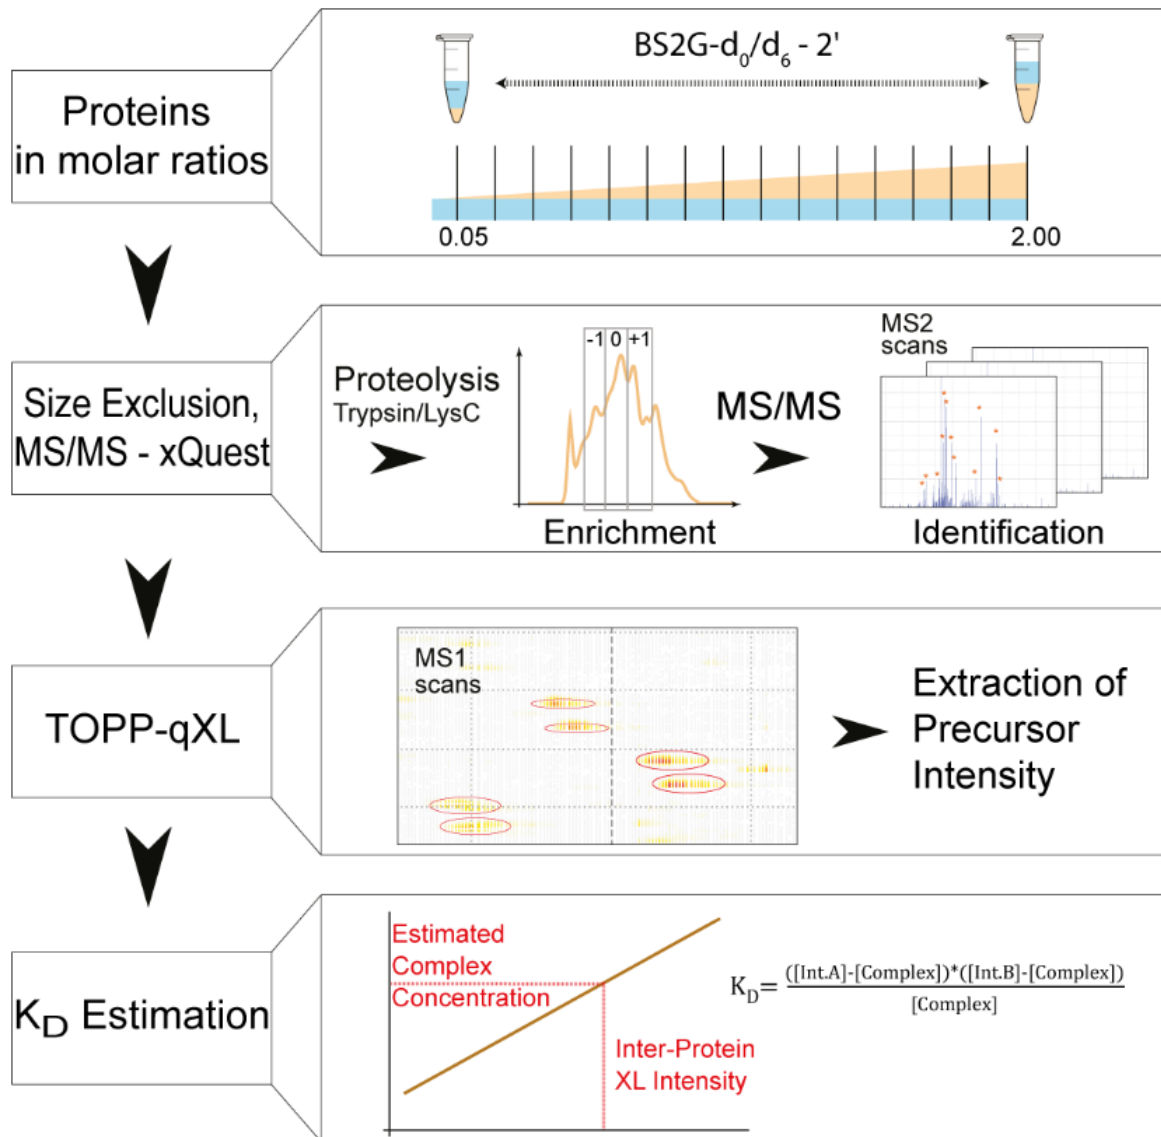

778

779 **Fig. 1: Schematic workflow of estimating protein affinities by quantitative XLMS.** The  
780 binding partners were titrated by increasing the molar ratio of one interactor. Crosslinked  
781 proteins were proteolytically digested, enriched by size exclusion chromatography and linked  
782 peptides were identified by tandem mass spectrometry and the software xQuest<sup>23,24</sup>. Precursor  
783 intensities of the crosslinks were extracted using our TOPP-qXL (The OpenMS Proteomics  
784 Pipeline-quantitative XLMS) bioinformatics workflow. The intensities of intra- and inter-  
785 protein site-site links were applied to estimate the concentration of free interactors and complex  
786 and for the statistical modeling of apparent  $K_D$  values.



787 **Fig. 2**

788

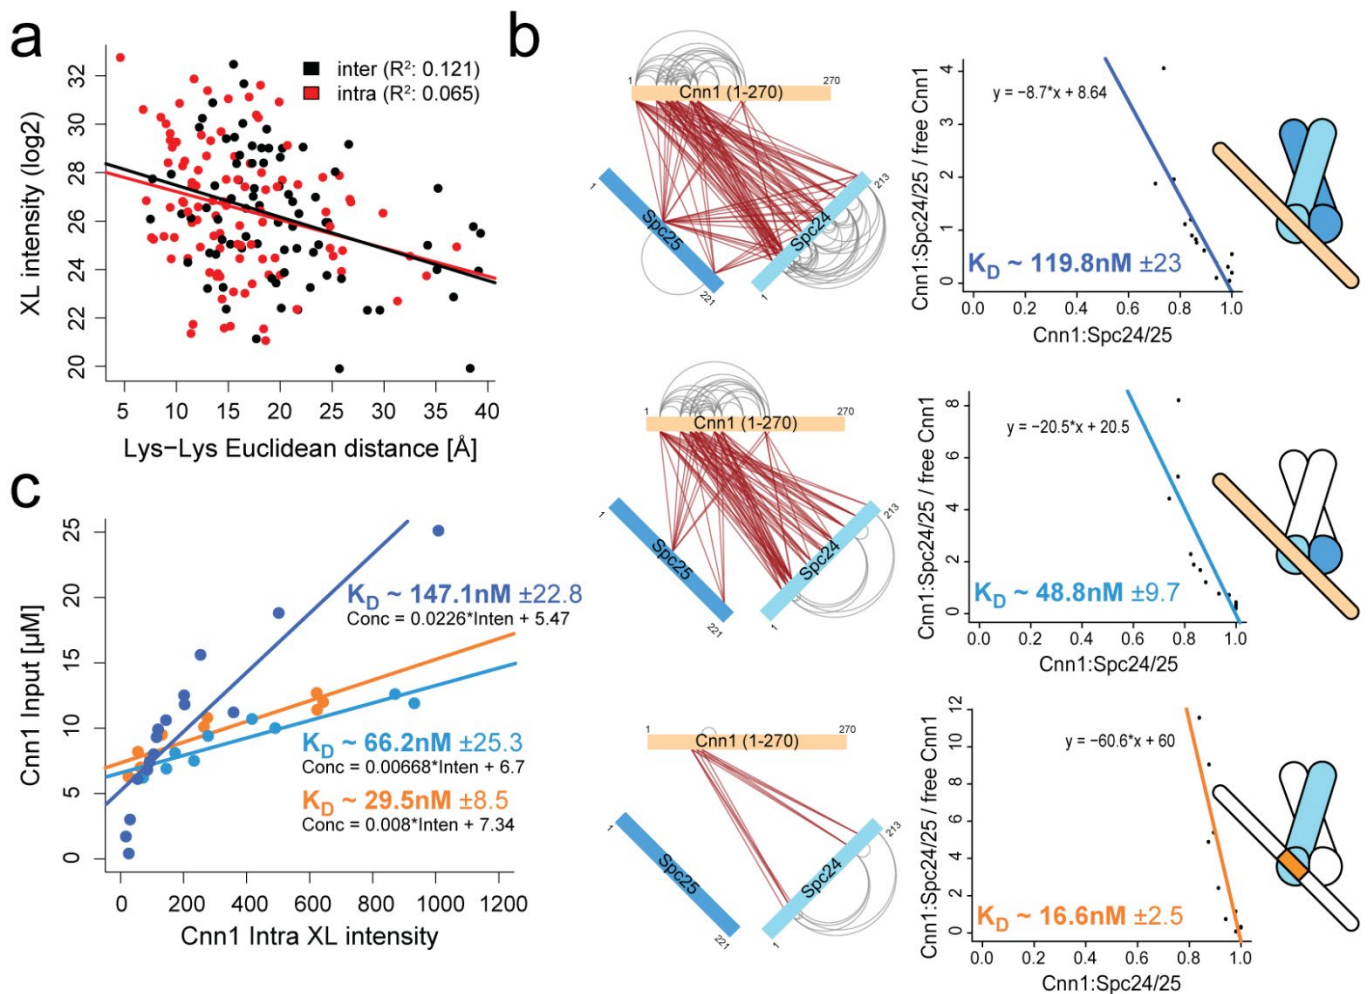

789

790 **Fig. 2: Estimation of apparent  $K_D$  values in protein complexes using quantitative XLMS.**

791 **a**, Correlation of increasing crosslink intensities with decreasing Euclidean distances between

792 crosslinked residues obtained from RNA polymerases analyses (Supplementary Fig. 2). The

793 R-squared statistics and Fisher's test was computed ( $p$ -value(intra)=0.00526,  $p$ -

794 value(inter)=0.00098). **b**, Estimation of apparent  $K_D$  values of the Cnn1<sup>1-270</sup>:Spc24/25

795 interaction by the *Scatchard* plot using different subsets of inter-protein crosslinks to quantify

796 complex formation. **c**, Apparent  $K_D$  values were calculated based on the concentration of

797 formed complex interpolated from the linear regression and averaged across molar ratios of the

798 titration steps.

799 **Fig. 3**

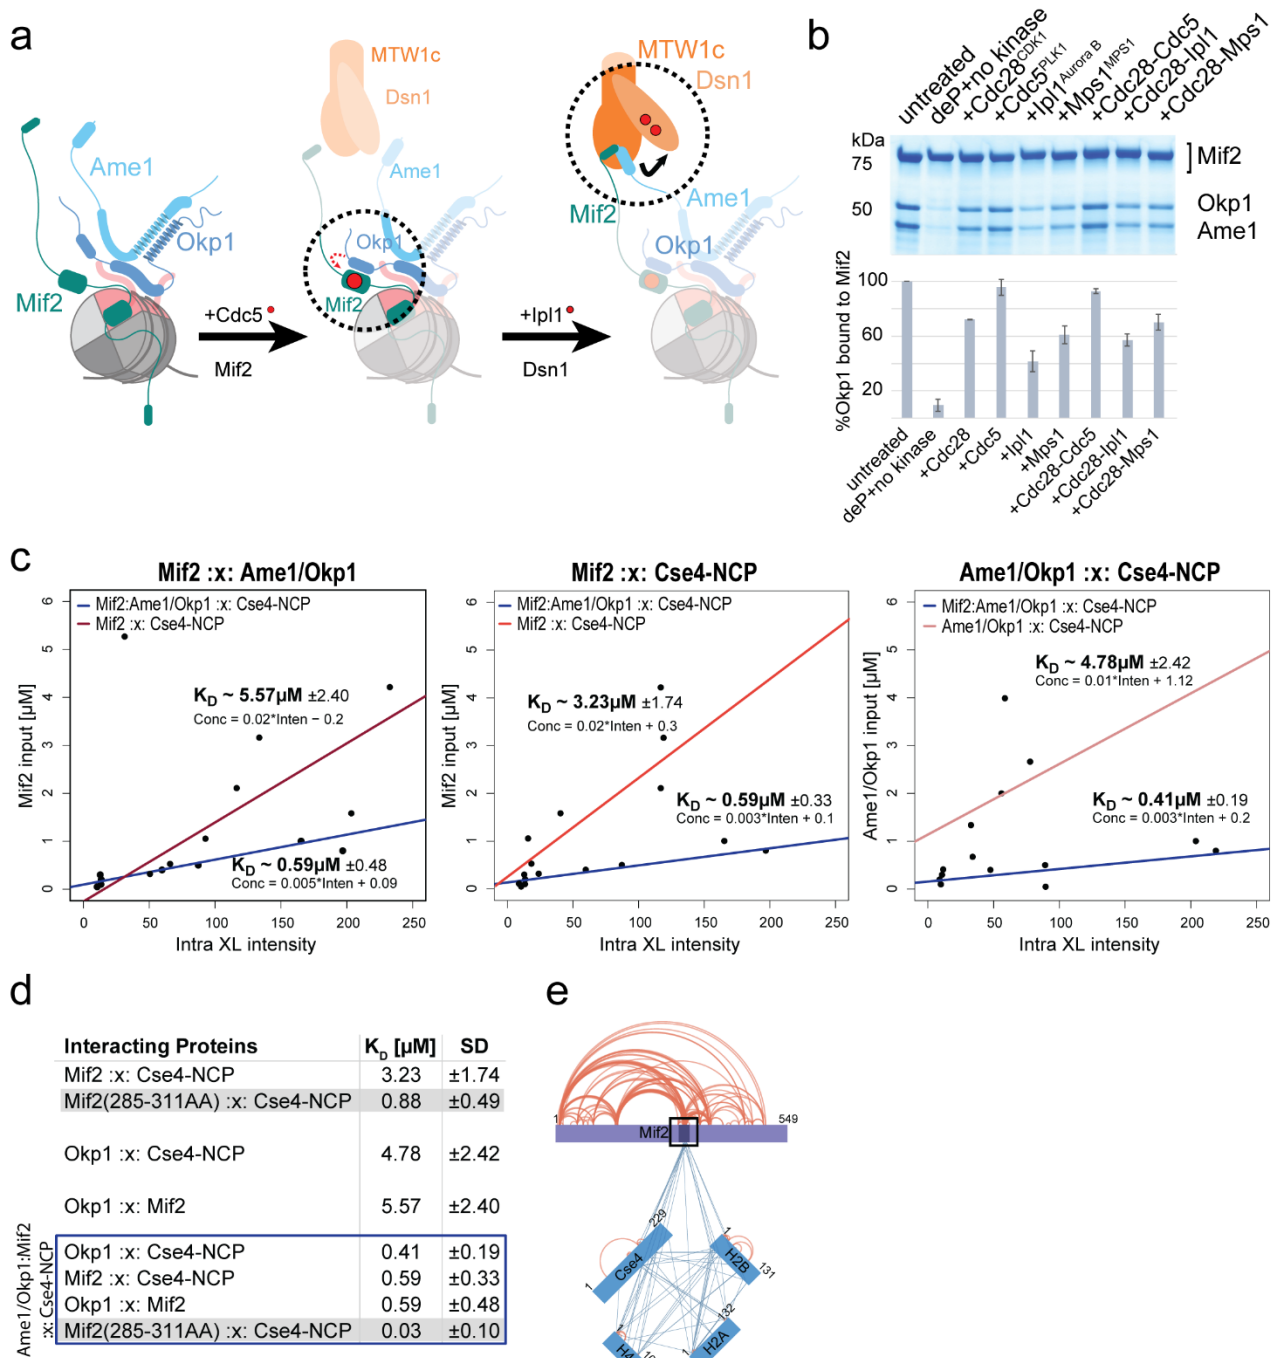

800

801 **Fig. 3: The phosphorylation-dependent binding of Mif2\* to Ame1/Okp1 cooperatively**

802 **stabilizes their interactions with the Cse4-NCP. a, Reconstitution of the Mif2:Ame1/Okp1**

803 **interaction by dephosphorylation (deP) of Mif2 and subsequent *in vitro* phosphorylation with**

804 **the indicated kinases (mean  $\pm$ SD of 3 replicates). b, Schematic representation of the assembly**



805 of MTW1c, Mif2, and Ame1/Okp1 on the Cse4-NCP. **c**, Estimation of apparent  $K_D$  values from  
806 XLMS analysis of Mif2\*:Ame1/Okp1, Mif2\*:Cse4-NCP and Ame1/Okp1:Cse4-NCP  
807 complexes compared to the apparent  $K_D$  values within the Mif2\*:Ame1/Okp1:Cse4-NCP  
808 complex (mean  $\pm$ SD of 3 replicates). **d**, Summary of estimated  $K_D$  values including the  $K_D$   
809 determination of the Mif2:Cse4-NCP interaction using the subset of inter-protein crosslinks to  
810 the Mif2<sup>285-311</sup> signature motif. **e**, Network plot of Mif2\*:Cse4-NCP crosslinks intersecting  
811 with Mif2<sup>285-311</sup>.

812

813

814

815

816

817

818

819

820

821

822

823

824

825

826

827

828

829

830 **Fig. 4**

831

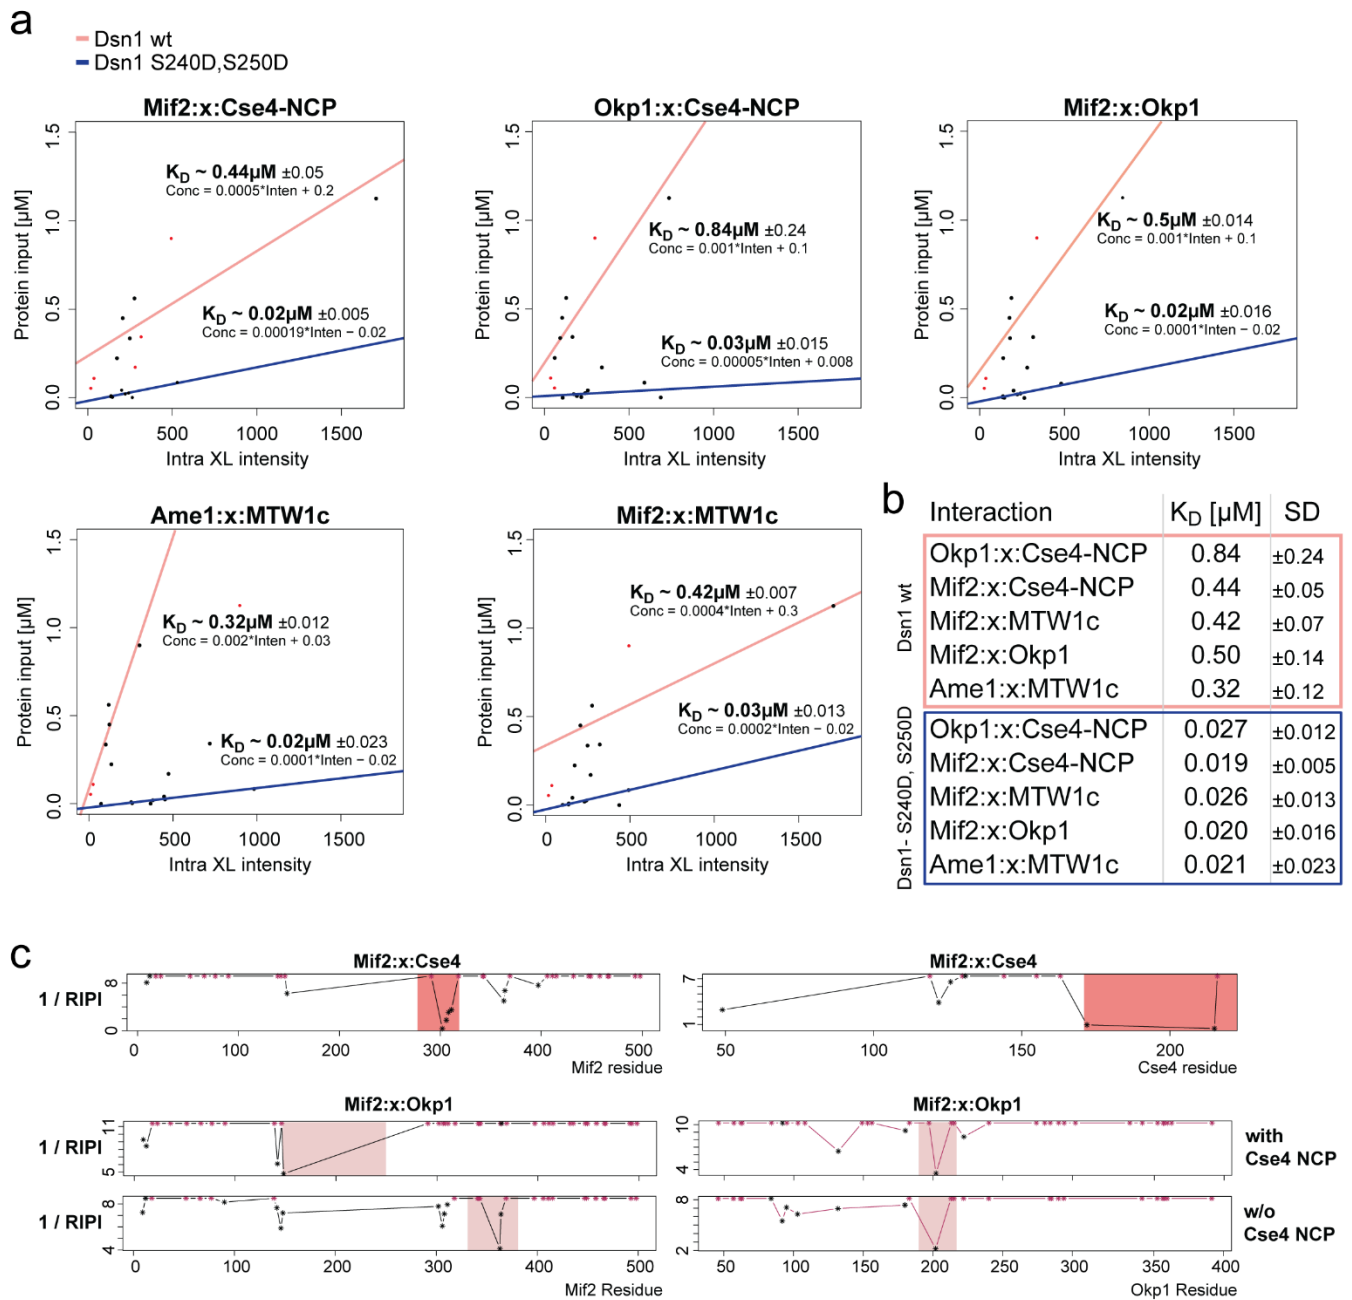

832

833

834 **Fig. 4: Binding of the MTW1c cooperatively increased the affinity of the Mif2\* and**

835 **Ame1/Okp1 interaction to the Cse4-NCP. a, Estimation of apparent  $K_D$  values by titrating**

836 **Cse4-NCPs with increasing concentrations of a MTW1c:Mif2\*:Ame1/Okp1 complex**

837 **containing either wild-type Dsn1 or phosphorylation-mimicking Dsn1<sup>S240D,S250D</sup> (mean  $\pm$ SD of**

838 2 replicates). **b**, Summary of  $K_D$  values showing the effect upon binding of  
839 MTW1c(Dsn1<sup>S240D,S250D</sup>). **c**, Prediction of the Mif2\*:Cse4 and Mif2\*:Okp1 interface by  
840 calculating the RIPI based on inter-protein crosslink intensities (Supplementary Fig. 2 and  
841 Methods).

842

843

844

845

846

847

848

849

850

851

852

853

854

855

856

857

858

859

860

861

862

863 **Fig. 5**

864

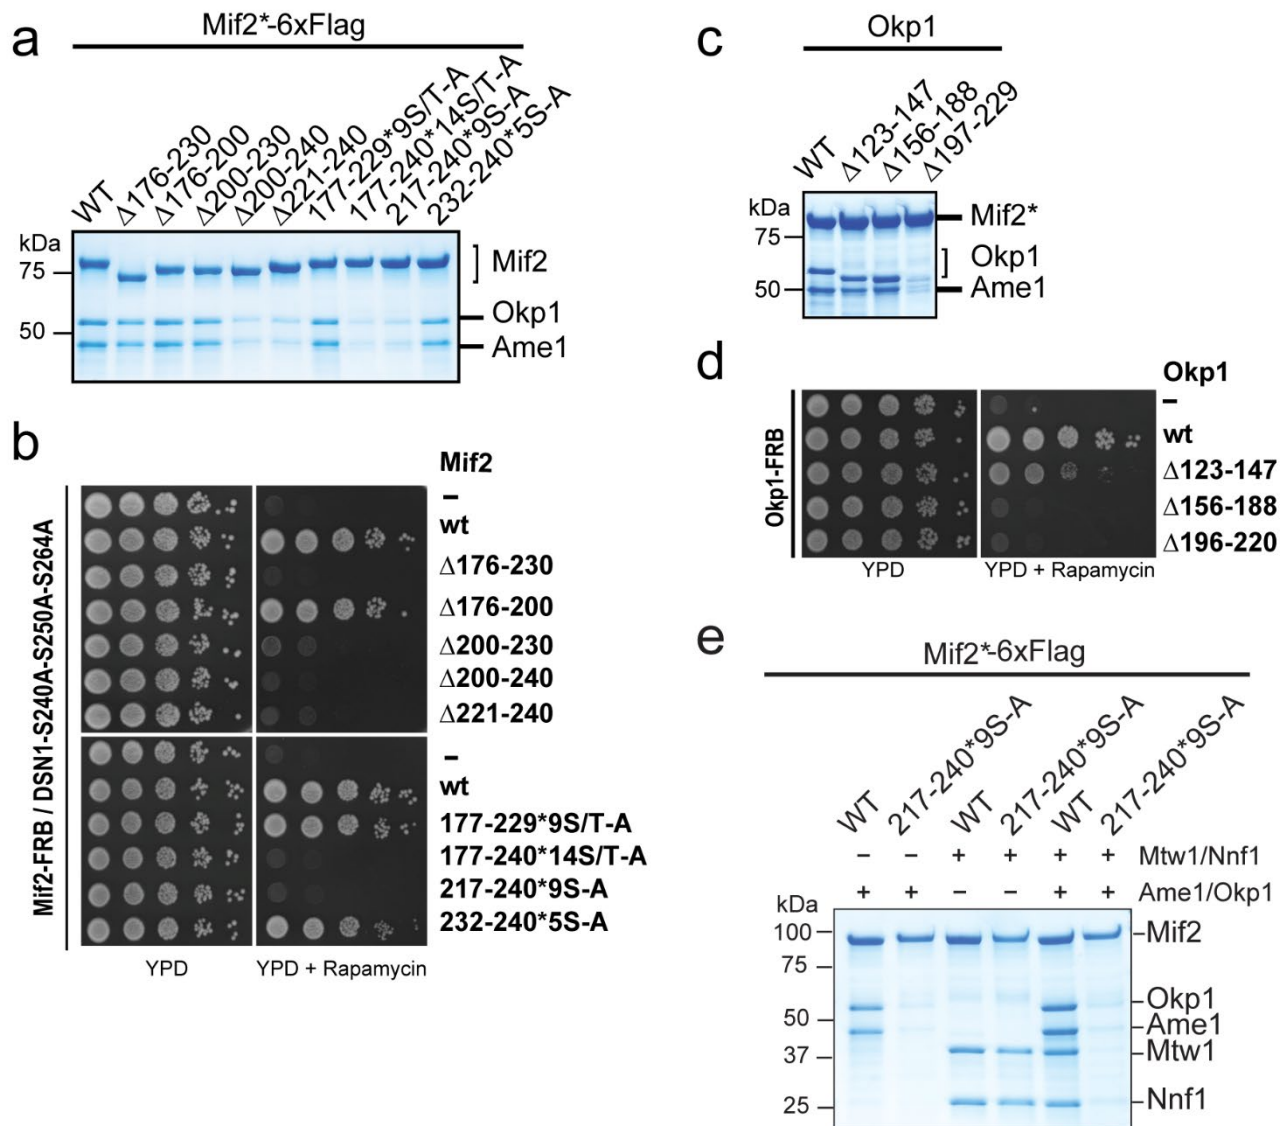

865

866

867 **Fig. 5: Phosphorylation of Mif2 and Dsn1 mediates a cooperative high-affinity link to the**

868 **Cse4-NCP and is essential for cell viability. a, *In vitro* binding assay to identify the**

869 **Ame1/Okp1 binding site on Mif2\* using the indicated Mif2\* deletion and phosphorylation-**

870 **ablative mutants. b, Assay monitoring the rescue of cell growth upon nuclear depletion of Mif2**

871 **using the anchor-away method through the ectopic expression of wild-type Mif2 or its indicated**

872 **deletion or phosphorylation-ablative mutants in a *Mif2-FRB/Dsn1S240A-S250A-S264A***

873 background. **c**, Identification of the Mif2\* binding site on Okp1 by assessing the binding of  
874 Okp1 deletion mutants *in vitro*. **d**, Assay of the effect of ectopically expressed Okp1 deletion  
875 mutants on cell growth in an *Okp1-FRB* anchor-away strain. **e**, *In vitro* assay to determine the  
876 effect of 9 putative phosphorylation sites within Mif2<sup>217-240</sup> on the interaction of Mif2 and  
877 Ame1/Okp1 with Mtw1/Nnf1.

878

879

880

881

882

883

884

885

886

887

888

889

890

891

892

893

894

895

896

897

898

899

900 **Fig. 6**

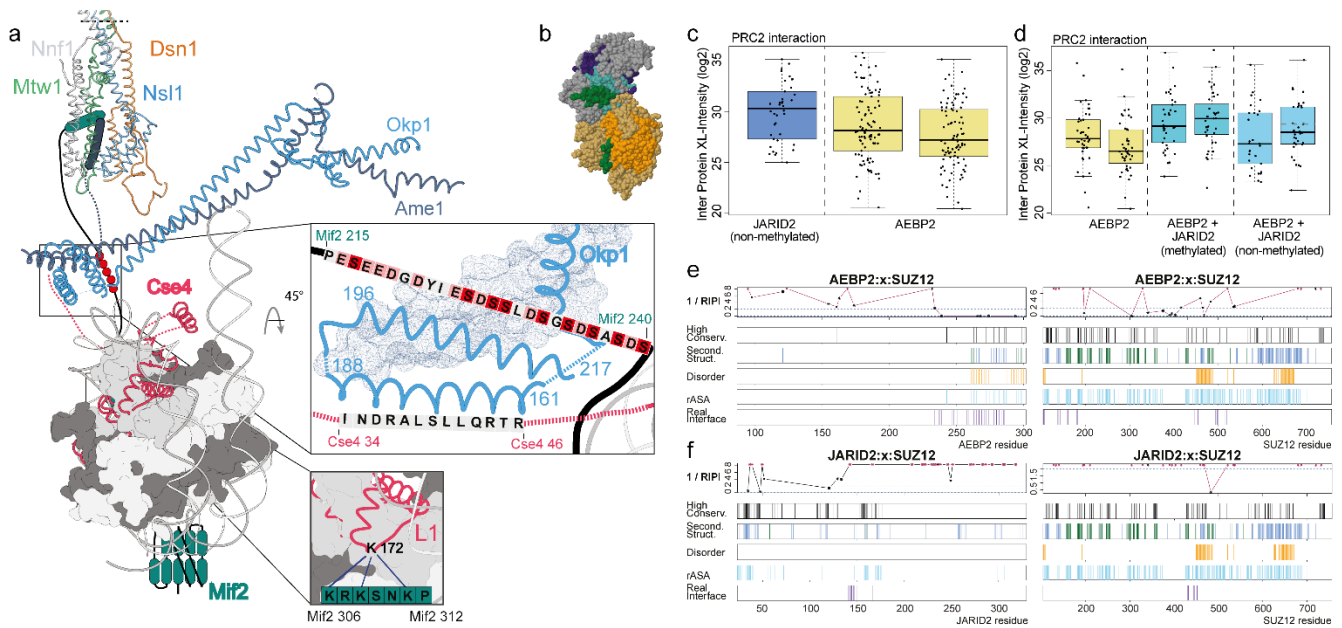

901

902

903 **Fig. 6: Summary of quantitative XLMS applications to the kinetochore and PRC2**

904 **datasets. a,** Structural model of cooperative kinetochore stabilization on the Cse4 nucleosome

905 through phosphorylation-induced interactions. Model of the MTW1c:Mif2:Ame1/Okp1:Cse4-

906 NCP complex based on cryo electron microscopy and crystal structures (PDB 6NUW, 6QLD,

907 5T58) depicting the subunit contacts essential for establishing the cooperative binding of Cse4-

908 NCPs by Mif2 and Ame1/Okp1 upon phosphorylation of Dsn1 and Mif2<sup>30,34</sup>. L1 shows Cse4

909 loop1. Light red and red residues within the Mif2<sup>215-240</sup> sequence indicate acidic and putatively

910 phosphorylated amino acids, respectively. **b,** Cryo electron microscopy density map of the

911 PRC2 complex with the cofactors JARID2 (dark green) and AEBP2 (cyan) (PDB 6C23)

912 showing the subunits SUZ12 (grey), EED (orange), EZH2 (kaki) and RBAP48 (violet). **c,**

913 Estimation of relative affinities of the cofactors AEBP2 and JARID2 to the PRC2 complex

914 based on crosslink intensities which were extracted and quantified by the TOPP-qXL pipeline.

915 Boxplots with the same colour indicate replicates. **d,** Relative affinity change of AEBP2 for

916 the PRC2 complex in the presence of methylated and non-methylated JARID2. **e, f,** Interface

917 sequence regions are indicated by RIPI blots, calculated from crosslink intensities, for the  
918 interactions of SUZ12 with (e) AEBP2 and (f) JARID2. Inter-protein crosslink lysines are  
919 represented as black asterisk. The top 20% conserved residues within the protein sequences are  
920 indicated. Secondary structures are shown as alpha helices (blue) and beta strands (green). Real  
921 interface residues were obtained from the PDB 6C23.
